# Supplementary material for: A CO2-stable reduction-tolerant Nd-containing dual phase membrane for oxyfuel CO2capture
Source: Royal Society of Chemistry journal article supplement (doi:10.1039/c3ta14870j), 2014-01-01
Supplement: c3ta14870j1.pdf [file c3ta14870j1.pdf]

## Supporting information

### CO<sub>2</sub>-stable reduction-tolerant Nd-containing dual phase membrane for oxyfuel CO<sub>2</sub> capture

Huixia Luo,<sup>a,b\*</sup> Tobias. Klande,<sup>a</sup> Zhengwen Cao,<sup>a</sup> Fangyi Liang,<sup>a</sup> Haihui Wang,<sup>c\*</sup> and Jürgen Caro<sup>a\*</sup>

<sup>a</sup> Institute of Physical Chemistry and Electrochemistry, Leibniz University of Hannover, Callinstr. 3A, D-30167 Hannover, Germany

<sup>b</sup> Department of Chemistry, Princeton University, Princeton, New Jersey 08544, USA

<sup>c</sup> School of Chemistry & Chemical Engineering, South China University of Technology, No. 381 Wushan Road, 510640 Guangzhou, China

**Table 1S.** Lattice parameters of NSFO and CNO as pure phases and in the 40NSFO - 60CNO dual phase powder calcined at 950 °C for 10 h and the 40NSFO - 60CNO dual phase membrane sintered at 1400 °C for 5 h.

| Materials                   | Orthorhombic phase     |        |        | Cubic phase             |                                 |
|-----------------------------|------------------------|--------|--------|-------------------------|---------------------------------|
|                             | (space group 74, Imma) |        |        | (space group 225, Fm3m) |                                 |
|                             | a(Å)                   | b(Å)   | c(Å)   | a(Å)                    | Lattice volume(Å <sup>3</sup> ) |
| Pure NSFO powder            | 5.4788                 | 7.7442 | 5.4983 | -                       |                                 |
| Pure CNO powder             | -                      | -      | -      | 5.4309                  | 160.18                          |
| 40NSFO-60CNO mixture powder | 5.4869                 | 7.7571 | 5.4979 | 5.4378                  | 160.79                          |
| 40NSFO-60CNO membrane       | 5.4902                 | 7.7616 | 5.4977 | 5.4361                  | 160.64                          |

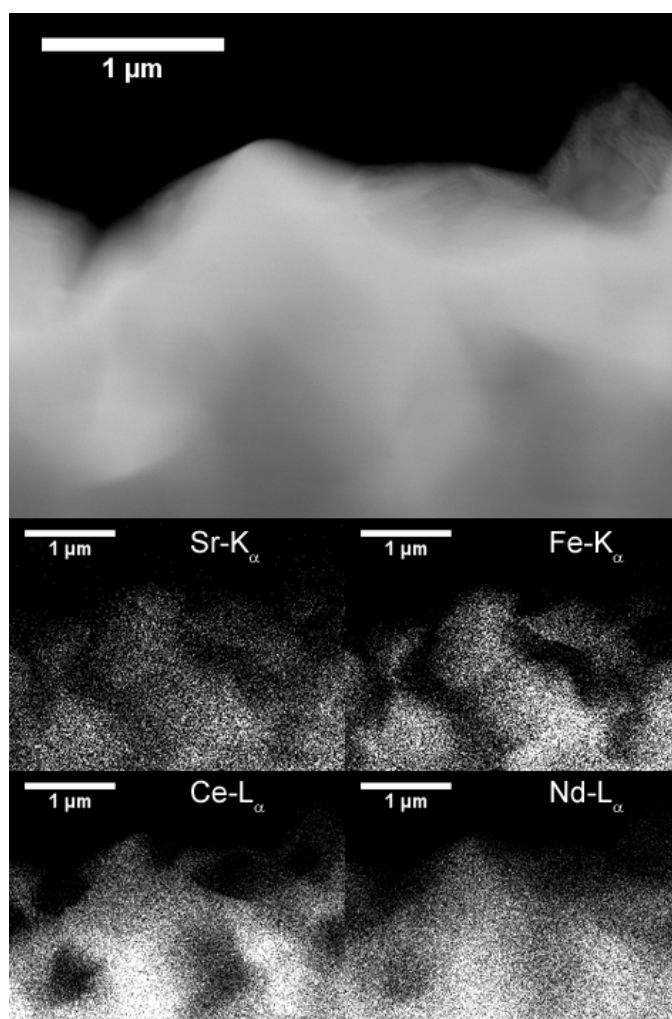

**Figure 1S.** STEM (top) and EDXS (bottom) images of the 40NSFO-60CNO membrane after sintered at 1400 °C for 5 h in air before polishing.
